# Supplementary material
Source: publisher figshare collection journal article supplement (https://acs.figshare.com/ndownloader/files/3594384)
Supplement: Supplementary file 1 [file 3594384]

# **Sustainable Mobility, Future Fuels and the Periodic Table**

Presentation Materials

# What properties do we desire in a fuel?

- **Prefer not to carry more than one reactant on vehicle; take second reactant from the atmosphere.**
  - Air is 78%  $\text{N}_2$ , 21%  $\text{O}_2$ , 1% Ar.  $\text{N}_2$  is poor reactant ( $\text{N}\equiv\text{N}$  bond too strong), Ar is unreactive, leaves  $\text{O}_2$ .
- **Fuel should have highly exothermic reaction with  $\text{O}_2$** 
  - ... but not at ambient temperature (kinetics and thermochemistry).
- **Fuel should have high gravimetric and volumetric energy density.**
- **Fuel and exhaust should be easy to handle (i.e., liquid or gas [not solid] over “typical” temperature operation range of -20 to +40 °C).**
- **Exhaust should be non-toxic and unreactive with air or water.**
- **Fuel should be abundant in nature or easy to make.**
  - We need millions of tons every day.
- **Fuel itself should be environmentally benign and renewable**

# Periodic Table

|                 |                 |                 |                  |                  |                  |                  |                  |                  |                  |                  |                  |                   |                  |                   |                  |                   |                   |
|-----------------|-----------------|-----------------|------------------|------------------|------------------|------------------|------------------|------------------|------------------|------------------|------------------|-------------------|------------------|-------------------|------------------|-------------------|-------------------|
| 1<br><b>H</b>   |                 |                 |                  |                  |                  |                  |                  |                  |                  |                  |                  |                   |                  |                   |                  |                   | 2<br><b>He</b>    |
| 3<br><b>Li</b>  | 4<br><b>Be</b>  |                 |                  |                  |                  |                  |                  |                  |                  |                  |                  | 5<br><b>B</b>     | 6<br><b>C</b>    | 7<br><b>N</b>     | 8<br><b>O</b>    | 9<br><b>F</b>     | 10<br><b>Ne</b>   |
| 11<br><b>Na</b> | 12<br><b>Mg</b> |                 |                  |                  |                  |                  |                  |                  |                  |                  |                  | 13<br><b>Al</b>   | 14<br><b>Si</b>  | 15<br><b>P</b>    | 16<br><b>S</b>   | 17<br><b>Cl</b>   | 18<br><b>Ar</b>   |
| 19<br><b>K</b>  | 20<br><b>Ca</b> | 21<br><b>Sc</b> | 22<br><b>Ti</b>  | 23<br><b>V</b>   | 24<br><b>Cr</b>  | 25<br><b>Mn</b>  | 26<br><b>Fe</b>  | 27<br><b>Co</b>  | 28<br><b>Ni</b>  | 29<br><b>Cu</b>  | 30<br><b>Zn</b>  | 31<br><b>Ga</b>   | 32<br><b>Ge</b>  | 33<br><b>As</b>   | 34<br><b>Se</b>  | 35<br><b>Br</b>   | 36<br><b>Kr</b>   |
| 37<br><b>Rb</b> | 38<br><b>Sr</b> | 39<br><b>Y</b>  | 40<br><b>Zr</b>  | 41<br><b>Nb</b>  | 42<br><b>Mo</b>  | 43<br><b>Tc</b>  | 44<br><b>Ru</b>  | 45<br><b>Rh</b>  | 46<br><b>Pd</b>  | 47<br><b>Ag</b>  | 48<br><b>Cd</b>  | 49<br><b>In</b>   | 50<br><b>Sn</b>  | 51<br><b>Sb</b>   | 52<br><b>Te</b>  | 53<br><b>I</b>    | 54<br><b>Xe</b>   |
| 55<br><b>Cs</b> | 56<br><b>Ba</b> | *               | 72<br><b>Hf</b>  | 73<br><b>Ta</b>  | 74<br><b>W</b>   | 75<br><b>Re</b>  | 76<br><b>Os</b>  | 77<br><b>Ir</b>  | 78<br><b>Pt</b>  | 79<br><b>Au</b>  | 80<br><b>Hg</b>  | 81<br><b>Tl</b>   | 82<br><b>Pb</b>  | 83<br><b>Bi</b>   | 84<br><b>Po</b>  | 85<br><b>At</b>   | 86<br><b>Rn</b>   |
| 87<br><b>Fr</b> | 88<br><b>Ra</b> | **              | 104<br><b>Rf</b> | 105<br><b>Db</b> | 106<br><b>Sg</b> | 107<br><b>Bh</b> | 108<br><b>Hs</b> | 109<br><b>Mt</b> | 110<br><b>Ds</b> | 111<br><b>Rg</b> | 112<br><b>Cn</b> | 113<br><b>Uut</b> | 114<br><b>Fl</b> | 115<br><b>Uup</b> | 116<br><b>Lv</b> | 117<br><b>Uus</b> | 118<br><b>Uuo</b> |

\*

|                 |                 |                 |                 |                 |                 |                 |                 |                 |                 |                 |                  |                  |                  |                  |
|-----------------|-----------------|-----------------|-----------------|-----------------|-----------------|-----------------|-----------------|-----------------|-----------------|-----------------|------------------|------------------|------------------|------------------|
| 57<br><b>La</b> | 58<br><b>Ce</b> | 59<br><b>Pr</b> | 60<br><b>Nd</b> | 61<br><b>Pm</b> | 62<br><b>Sm</b> | 63<br><b>Eu</b> | 64<br><b>Gd</b> | 65<br><b>Tb</b> | 66<br><b>Dy</b> | 67<br><b>Ho</b> | 68<br><b>Er</b>  | 69<br><b>Tm</b>  | 70<br><b>Yb</b>  | 71<br><b>Lu</b>  |
| 89<br><b>Ac</b> | 90<br><b>Th</b> | 91<br><b>Pa</b> | 92<br><b>U</b>  | 93<br><b>Np</b> | 94<br><b>Pu</b> | 95<br><b>Am</b> | 96<br><b>Cm</b> | 97<br><b>Bk</b> | 98<br><b>Cf</b> | 99<br><b>Es</b> | 100<br><b>Fm</b> | 101<br><b>Md</b> | 102<br><b>No</b> | 103<br><b>Lr</b> |

\*\*

# On-board fuel requirements

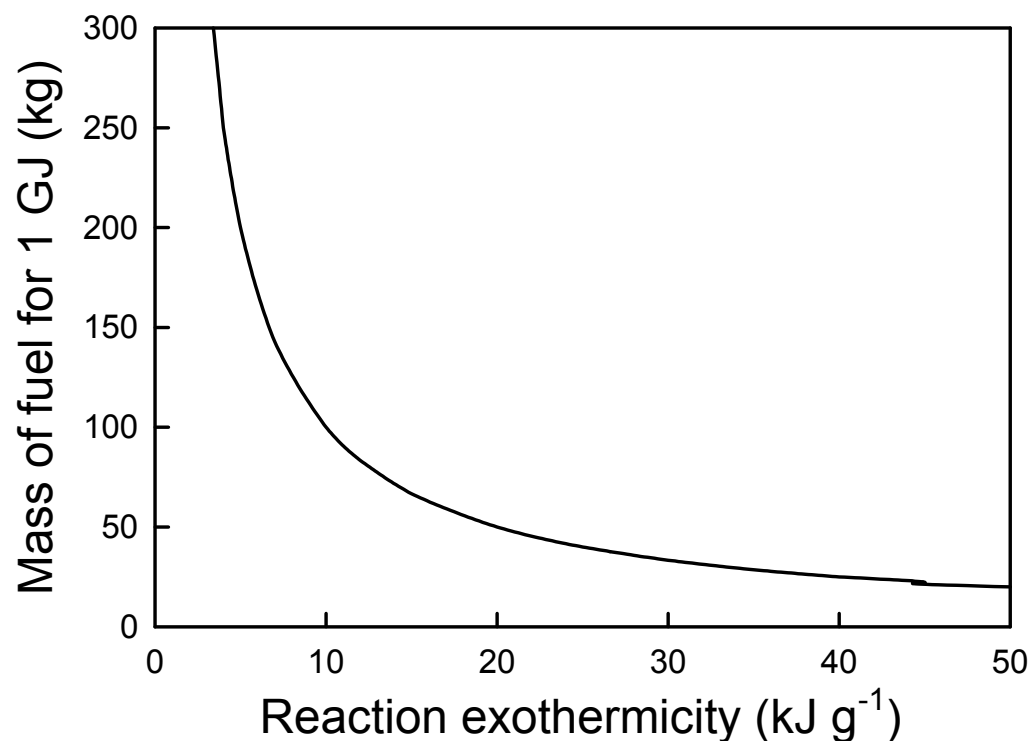

\* 10-20 gallons of gasoline weighs approximately 30-60 kg, and releases approximately 45 kJ/g.

Need to carry about 1-2 GJ (equivalent to approx. 10-20 gallons of gasoline\*) to match functionality of current vehicles. Impractical to carry > 100 kg fuel. Hence, fuel needs to release > 10 kJ/g (preferably >> 10 kJ/g)

Highly endothermic compounds tend to be unstable. Equate maximum exothermicity of oxidation of compounds with exothermicity of oxidation of their constituent elements

# Elements with enthalpy of oxidation greater than 10 kJ per gram

| Periodic Table |          |          |           |           |           |           |           |           |           |           |           |            |           |            |           |            |            |
|----------------|----------|----------|-----------|-----------|-----------|-----------|-----------|-----------|-----------|-----------|-----------|------------|-----------|------------|-----------|------------|------------|
| 1<br>H         |          |          |           |           |           |           |           |           |           |           |           |            |           |            |           |            | 2<br>He    |
| 3<br>Li        | 4<br>Be  |          |           |           |           |           |           |           |           |           |           |            |           |            |           |            | 10<br>Ne   |
| 11<br>Na       | 12<br>Mg | 13<br>Al | 14<br>Si  | 15<br>P   | 16<br>S   | 17<br>Cl  | 18<br>Ar  |           |           |           |           |            |           |            |           |            |            |
| 19<br>K        | 20<br>Ca | 21<br>Sc | 22<br>Ti  | 23<br>V   | 24<br>Cr  | 25<br>Mn  | 26<br>Fe  | 27<br>Co  | 28<br>Ni  | 29<br>Cu  | 30<br>Zn  | 31<br>Ga   | 32<br>Ge  | 33<br>As   | 34<br>Se  | 35<br>Br   | 36<br>Kr   |
| 37<br>Rb       | 38<br>Sr | 39<br>Y  | 40<br>Zr  | 41<br>Nb  | 42<br>Mo  | 43<br>Tc  | 44<br>Ru  | 45<br>Rh  | 46<br>Pd  | 47<br>Ag  | 48<br>Cd  | 49<br>In   | 50<br>Sn  | 51<br>Sb   | 52<br>Te  | 53<br>I    | 54<br>Xe   |
| 55<br>Cs       | 56<br>Ba | 57<br>La | 58<br>Ce  | 59<br>Pr  | 60<br>Nd  | 61<br>Pm  | 62<br>Sm  | 63<br>Eu  | 64<br>Gd  | 65<br>Tb  | 66<br>Dy  | 67<br>Ho   | 68<br>Er  | 69<br>Tm   | 70<br>Yb  | 71<br>Lu   | 72<br>Hf   |
| 87<br>Fr       | 88<br>Ra | **       | 104<br>Rf | 105<br>Db | 106<br>Sg | 107<br>Bh | 108<br>Hs | 109<br>Mt | 110<br>Ds | 111<br>Rg | 112<br>Cn | 113<br>Uut | 114<br>Fl | 115<br>Uup | 116<br>Lv | 117<br>Uus | 118<br>Uuo |

  

|    |          |          |          |          |          |          |          |          |          |          |          |           |           |           |           |
|----|----------|----------|----------|----------|----------|----------|----------|----------|----------|----------|----------|-----------|-----------|-----------|-----------|
| *  | 57<br>La | 58<br>Ce | 59<br>Pr | 60<br>Nd | 61<br>Pm | 62<br>Sm | 63<br>Eu | 64<br>Gd | 65<br>Tb | 66<br>Dy | 67<br>Ho | 68<br>Er  | 69<br>Tm  | 70<br>Yb  | 71<br>Lu  |
| ** | 89<br>Ac | 90<br>Th | 91<br>Pa | 92<br>U  | 93<br>Np | 94<br>Pu | 95<br>Am | 96<br>Cm | 97<br>Bk | 98<br>Cf | 99<br>Es | 100<br>Fm | 101<br>Md | 102<br>No | 103<br>Lr |

# Elements with non-solid oxides

|          |                |          |           |           |           |           |           |           |           |           |           |            |           |            |           |            |            |
|----------|----------------|----------|-----------|-----------|-----------|-----------|-----------|-----------|-----------|-----------|-----------|------------|-----------|------------|-----------|------------|------------|
| 1<br>H   | Periodic Table |          |           |           |           |           |           |           |           |           |           |            |           |            |           |            | 2<br>He    |
| 3<br>Li  | 4<br>Be        |          |           |           |           |           |           |           |           |           |           | 5<br>B     | 6<br>C    | 7<br>N     | 8<br>O    | 9<br>F     | 10<br>Ne   |
| 11<br>Na | 12<br>Mg       |          |           |           |           |           |           |           |           |           |           | 13<br>Al   | 14<br>Si  | 15<br>P    | 16<br>S   | 17<br>Cl   | 18<br>Ar   |
| 19<br>K  | 20<br>Ca       | 21<br>Sc | 22<br>Ti  | 23<br>V   | 24<br>Cr  | 25<br>Mn  | 26<br>Fe  | 27<br>Co  | 28<br>Ni  | 29<br>Cu  | 30<br>Zn  | 31<br>Ga   | 32<br>Ge  | 33<br>As   | 34<br>Se  | 35<br>Br   | 36<br>Kr   |
| 37<br>Rb | 38<br>Sr       | 39<br>Y  | 40<br>Zr  | 41<br>Nb  | 42<br>Mo  | 43<br>Tc  | 44<br>Ru  | 45<br>Rh  | 46<br>Pd  | 47<br>Ag  | 48<br>Cd  | 49<br>In   | 50<br>Sn  | 51<br>Sb   | 52<br>Te  | 53<br>I    | 54<br>Xe   |
| 55<br>Cs | 56<br>Ba       | *        | 72<br>Hf  | 73<br>Ta  | 74<br>W   | 75<br>Re  | 76<br>Os  | 77<br>Ir  | 78<br>Pt  | 79<br>Au  | 80<br>Hg  | 81<br>Tl   | 82<br>Pb  | 83<br>Bi   | 84<br>Po  | 85<br>At   | 86<br>Rn   |
| 87<br>Fr | 88<br>Ra       | **       | 104<br>Rf | 105<br>Db | 106<br>Sg | 107<br>Bh | 108<br>Hs | 109<br>Mt | 110<br>Ds | 111<br>Rg | 112<br>Cn | 113<br>Uut | 114<br>Fl | 115<br>Uup | 116<br>Lv | 117<br>Uus | 118<br>Uuo |
|          |                | *        | 57<br>La  | 58<br>Ce  | 59<br>Pr  | 60<br>Nd  | 61<br>Pm  | 62<br>Sm  | 63<br>Eu  | 64<br>Gd  | 65<br>Tb  | 66<br>Dy   | 67<br>Ho  | 68<br>Er   | 69<br>Tm  | 70<br>Yb   | 71<br>Lu   |
|          |                | **       | 89<br>Ac  | 90<br>Th  | 91<br>Pa  | 92<br>U   | 93<br>Np  | 94<br>Pu  | 95<br>Am  | 96<br>Cm  | 97<br>Bk  | 98<br>Cf   | 99<br>Es  | 100<br>Fm  | 101<br>Md | 102<br>No  | 103<br>Lr  |

Elements left after eliminating those with:  
 (i) solid oxides, (ii) low heat release on oxidation, and (iii) toxic oxides.

|                |          |          |           |           |           |           |           |           |           |           |           |            |           |            |           |            |            |         |        |        |        |          |  |  |  |  |  |  |  |  |  |  |  |  |  |
|----------------|----------|----------|-----------|-----------|-----------|-----------|-----------|-----------|-----------|-----------|-----------|------------|-----------|------------|-----------|------------|------------|---------|--------|--------|--------|----------|--|--|--|--|--|--|--|--|--|--|--|--|--|
| Periodic Table |          |          |           |           |           |           |           |           |           |           |           |            |           |            |           |            |            | 2<br>He |        |        |        |          |  |  |  |  |  |  |  |  |  |  |  |  |  |
| 1<br>H         |          |          |           |           |           |           |           |           |           |           |           |            |           |            |           |            | 5<br>B     | 6<br>C  | 7<br>N | 8<br>O | 9<br>F | 10<br>Ne |  |  |  |  |  |  |  |  |  |  |  |  |  |
| 3<br>Li        | 4<br>Be  |          |           |           |           |           |           |           |           |           |           | 13<br>Al   | 14<br>Si  | 15<br>P    | 16<br>S   | 17<br>Cl   | 18<br>Ar   |         |        |        |        |          |  |  |  |  |  |  |  |  |  |  |  |  |  |
| 11<br>Na       | 12<br>Mg |          |           |           |           |           |           |           |           |           |           | 31<br>Ga   | 32<br>Ge  | 33<br>As   | 34<br>Se  | 35<br>Br   | 36<br>Kr   |         |        |        |        |          |  |  |  |  |  |  |  |  |  |  |  |  |  |
| 19<br>K        | 20<br>Ca | 21<br>Sc | 22<br>Ti  | 23<br>V   | 24<br>Cr  | 25<br>Mn  | 26<br>Fe  | 27<br>Co  | 28<br>Ni  | 29<br>Cu  | 30<br>Zn  | 31<br>Ga   | 32<br>Ge  | 33<br>As   | 34<br>Se  | 35<br>Br   | 36<br>Kr   |         |        |        |        |          |  |  |  |  |  |  |  |  |  |  |  |  |  |
| 37<br>Rb       | 38<br>Sr | 39<br>Y  | 40<br>Zr  | 41<br>Nb  | 42<br>Mo  | 43<br>Tc  | 44<br>Ru  | 45<br>Rh  | 46<br>Pd  | 47<br>Ag  | 48<br>Cd  | 49<br>In   | 50<br>Sn  | 51<br>Sb   | 52<br>Te  | 53<br>I    | 54<br>Xe   |         |        |        |        |          |  |  |  |  |  |  |  |  |  |  |  |  |  |
| 55<br>Cs       | 56<br>Ba | *        | 72<br>Hf  | 73<br>Ta  | 74<br>W   | 75<br>Re  | 76<br>Os  | 77<br>Ir  | 78<br>Pt  | 79<br>Au  | 80<br>Hg  | 81<br>Tl   | 82<br>Pb  | 83<br>Bi   | 84<br>Po  | 85<br>At   | 86<br>Rn   |         |        |        |        |          |  |  |  |  |  |  |  |  |  |  |  |  |  |
| 87<br>Fr       | 88<br>Ra | **       | 104<br>Rf | 105<br>Db | 106<br>Sg | 107<br>Bh | 108<br>Hs | 109<br>Mt | 110<br>Ds | 111<br>Rg | 112<br>Cn | 113<br>Uut | 114<br>Fl | 115<br>Uup | 116<br>Lv | 117<br>Uus | 118<br>Uuo |         |        |        |        |          |  |  |  |  |  |  |  |  |  |  |  |  |  |
|                |          |          |           |           |           |           |           |           |           |           |           |            |           |            |           |            |            |         |        |        |        |          |  |  |  |  |  |  |  |  |  |  |  |  |  |
|                |          | *        | 57<br>La  | 58<br>Ce  | 59<br>Pr  | 60<br>Nd  | 61<br>Pm  | 62<br>Sm  | 63<br>Eu  | 64<br>Gd  | 65<br>Tb  | 66<br>Dy   | 67<br>Ho  | 68<br>Er   | 69<br>Tm  | 70<br>Yb   | 71<br>Lu   |         |        |        |        |          |  |  |  |  |  |  |  |  |  |  |  |  |  |
|                |          | **       | 89<br>Ac  | 90<br>Th  | 91<br>Pa  | 92<br>U   | 93<br>Np  | 94<br>Pu  | 95<br>Am  | 96<br>Cm  | 97<br>Bk  | 98<br>Cf   | 99<br>Es  | 100<br>Fm  | 101<br>Md | 102<br>No  | 103<br>Lr  |         |        |        |        |          |  |  |  |  |  |  |  |  |  |  |  |  |  |

# Oxygenated fuels

Oxygen is not desirable from a gravimetric and volumetric energy density standpoint, but its presence can be very useful in other respects. Oxygenated fuels tend to have lower emissions of carbon monoxide, soot, and unburned hydrocarbons. Also, the hydrogen bonding in liquid oxygenated fuels results in enhanced evaporative cooling when liquid fuel is sprayed into the engine which decreases the likelihood of autoignition and hence increases fuel octane value.

Biomass feedstocks contain oxygen (glucose =  $C_6H_{12}O_6$ , cellulose = glucose polymer =  $(C_6H_{10}O_5)_n$ ). Transformation processes converting biomass into fuels generally target a reduction in oxygen content, but perhaps it is not necessary, or desirable, to remove all the oxygen.



Include oxygen because oxygenates have combustion chemistry advantages in spark-ignited engines and are conveniently derived from biomass.

|                |          |          |           |           |           |           |           |           |           |           |           |            |           |            |           |            |            |
|----------------|----------|----------|-----------|-----------|-----------|-----------|-----------|-----------|-----------|-----------|-----------|------------|-----------|------------|-----------|------------|------------|
| Periodic Table |          |          |           |           |           |           |           |           |           |           |           |            |           |            |           |            |            |
| 1<br>H         |          |          |           |           |           |           |           |           |           |           |           |            |           |            |           |            | 2<br>He    |
| 3<br>Li        | 4<br>Be  |          |           |           |           |           |           |           |           |           |           | 5<br>B     | 6<br>C    | 7<br>N     | 8<br>O    | 9<br>F     | 10<br>Ne   |
| 11<br>Na       | 12<br>Mg |          |           |           |           |           |           |           |           |           |           | 13<br>Al   | 14<br>Si  | 15<br>P    | 16<br>S   | 17<br>Cl   | 18<br>Ar   |
| 19<br>K        | 20<br>Ca | 21<br>Sc | 22<br>Ti  | 23<br>V   | 24<br>Cr  | 25<br>Mn  | 26<br>Fe  | 27<br>Co  | 28<br>Ni  | 29<br>Cu  | 30<br>Zn  | 31<br>Ga   | 32<br>Ge  | 33<br>As   | 34<br>Se  | 35<br>Br   | 36<br>Kr   |
| 37<br>Rb       | 38<br>Sr | 39<br>Y  | 40<br>Zr  | 41<br>Nb  | 42<br>Mo  | 43<br>Tc  | 44<br>Ru  | 45<br>Rh  | 46<br>Pd  | 47<br>Ag  | 48<br>Cd  | 49<br>In   | 50<br>Sn  | 51<br>Sb   | 52<br>Te  | 53<br>I    | 54<br>Xe   |
| 55<br>Cs       | 56<br>Ba | *        | 72<br>Hf  | 73<br>Ta  | 74<br>W   | 75<br>Re  | 76<br>Os  | 77<br>Ir  | 78<br>Pt  | 79<br>Au  | 80<br>Hg  | 81<br>Tl   | 82<br>Pb  | 83<br>Bi   | 84<br>Po  | 85<br>At   | 86<br>Rn   |
| 87<br>Fr       | 88<br>Ra | **       | 104<br>Rf | 105<br>Db | 106<br>Sg | 107<br>Bh | 108<br>Hs | 109<br>Mt | 110<br>Ds | 111<br>Rg | 112<br>Cn | 113<br>Uut | 114<br>Fl | 115<br>Uup | 116<br>Lv | 117<br>Uus | 118<br>Uuo |
|                |          |          |           |           |           |           |           |           |           |           |           |            |           |            |           |            |            |
| *              |          | 57<br>La | 58<br>Ce  | 59<br>Pr  | 60<br>Nd  | 61<br>Pm  | 62<br>Sm  | 63<br>Eu  | 64<br>Gd  | 65<br>Tb  | 66<br>Dy  | 67<br>Ho   | 68<br>Er  | 69<br>Tm   | 70<br>Yb  | 71<br>Lu   |            |
| **             |          | 89<br>Ac | 90<br>Th  | 91<br>Pa  | 92<br>U   | 93<br>Np  | 94<br>Pu  | 95<br>Am  | 96<br>Cm  | 97<br>Bk  | 98<br>Cf  | 99<br>Es   | 100<br>Fm | 101<br>Md  | 102<br>No | 103<br>Lr  |            |

# Energy density and specific energy for selected fuels

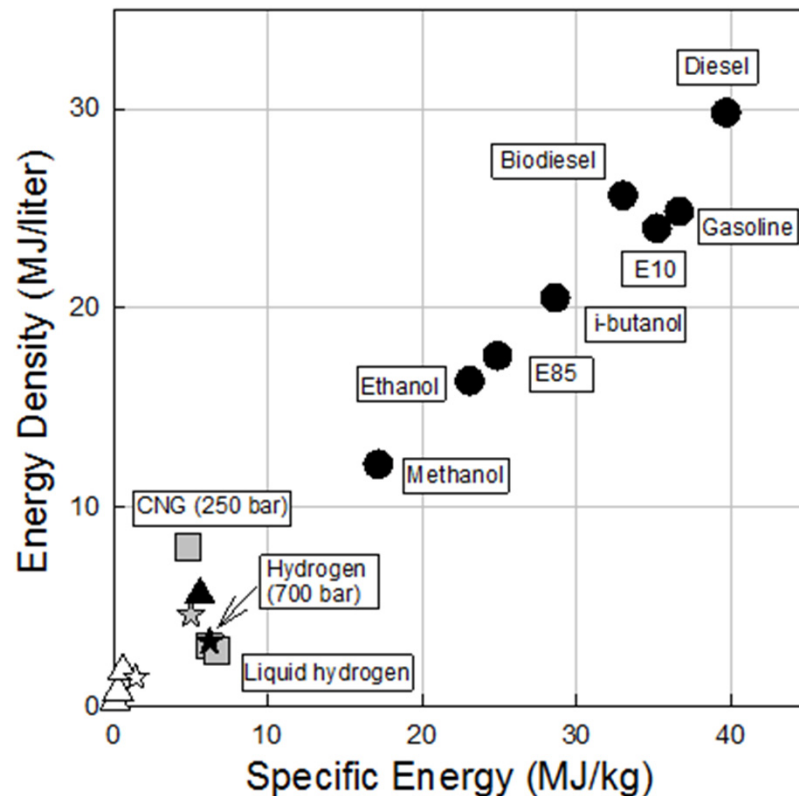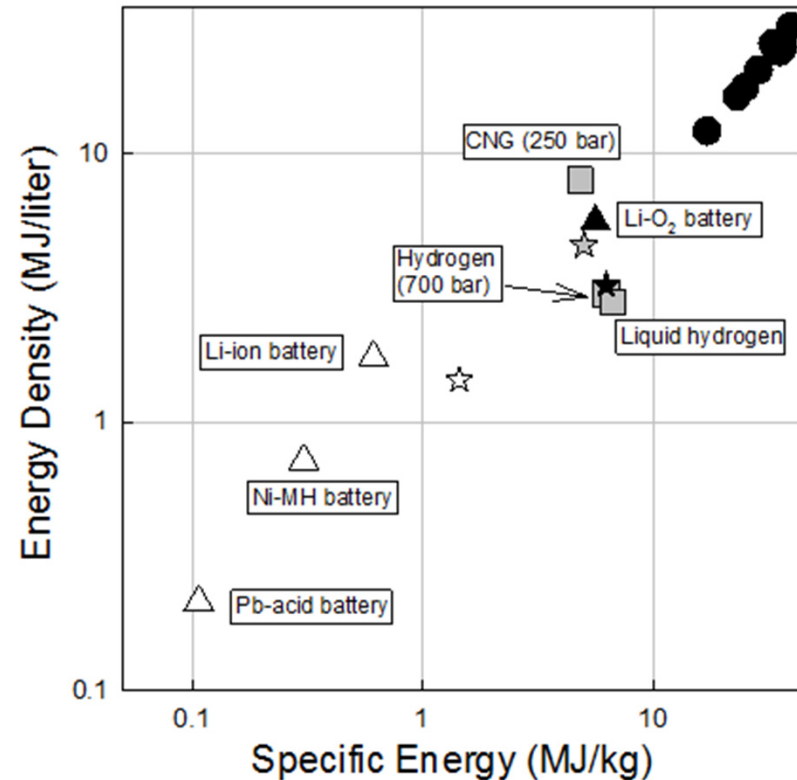

Energy density (MJ/liter) and specific energy (MJ/kg) are important parameters for a fuel. **Liquids are easy to package.**

# Volumetric and gravimetric range densities for selected fuels

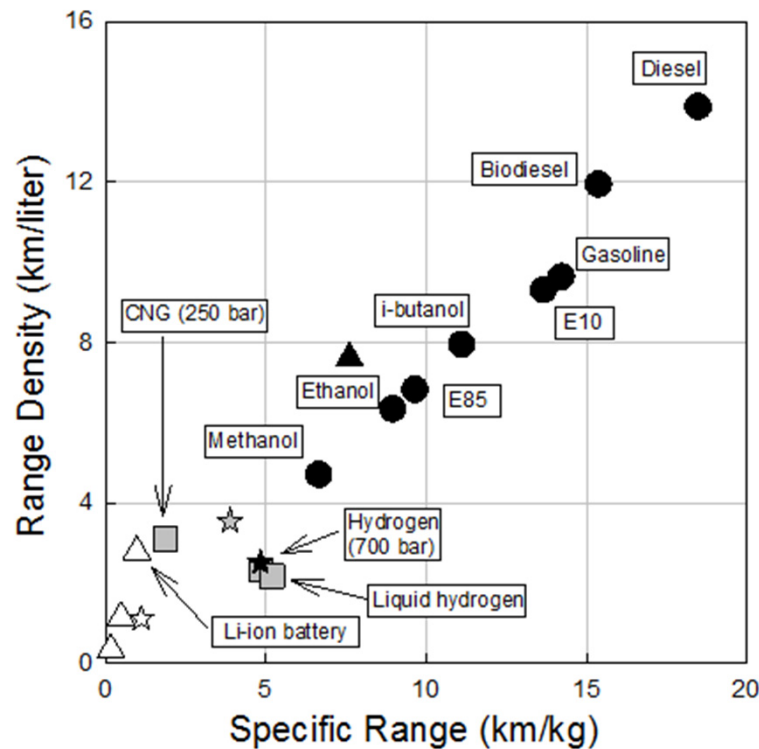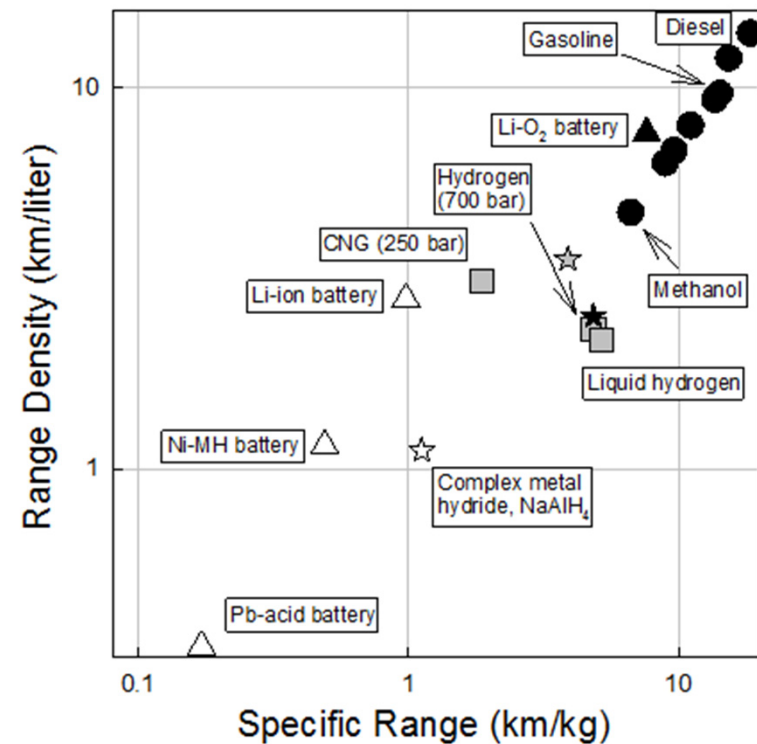

Alternative fuels will be compounds of H, C, possibly O and preferably liquids. With developments in battery technologies, electricity is becoming an attractive fuel.

# Conclusions

- Chemical trends in the periodic table and simple physics explain the current dominance of liquid hydrocarbons as transportation fuels.
- Sustainable mobility will be powered by low-CO<sub>2</sub> hydrogen, low-CO<sub>2</sub> hydrocarbons, low-CO<sub>2</sub> oxygenates, low-CO<sub>2</sub> electricity, or a combination of the above.
